# Supplementary material
Source: Springer Nature journal article supplement (https://www.springermedizin.de/resource/supplementary/13045_2008_42_MOESM2_ESM.pdf/9660534)

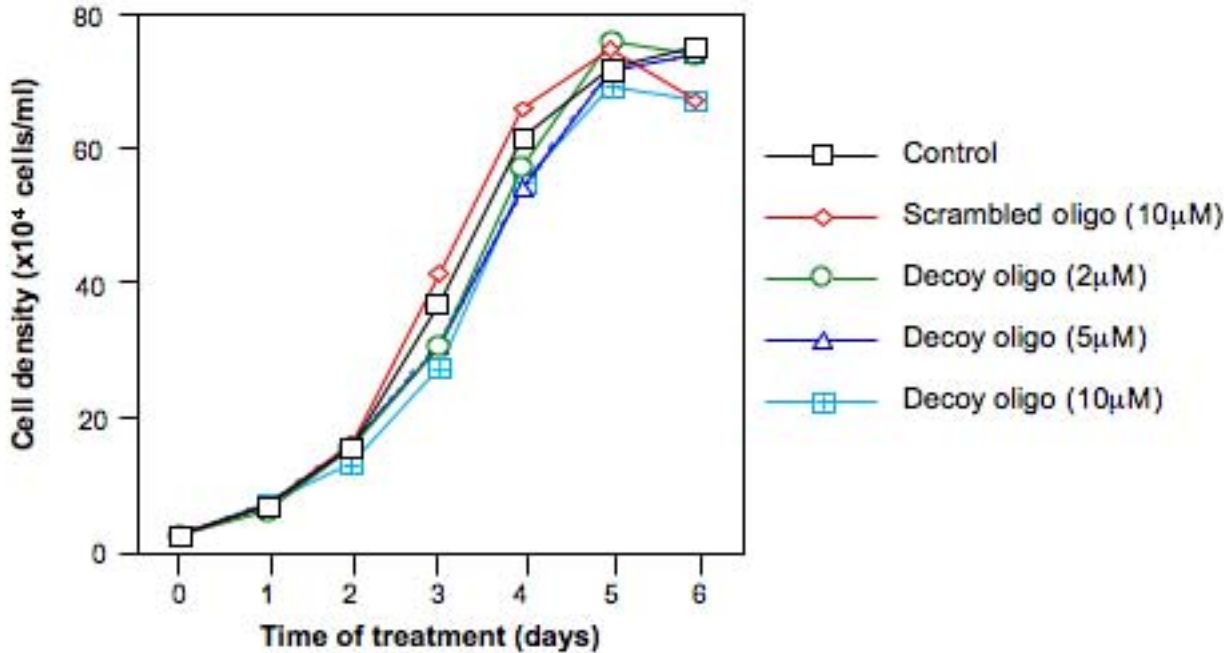

Supplement: MOESM2 [file 9660534]
